# Supplementary material for: Urban environment and mental health: the NAMED project, protocol for a mixed-method study
Source: PubMed Central journal article supplement — BMJ Open. 2020 Feb 20;10(2):e031963. doi: 10.1136/bmjopen-2019-031963 (PMC7045166; doi:10.1136/bmjopen-2019-031963), 2020-02-20
Supplement: bmjopen-2019-031963.draft_revisions.pdf [file bmjopen-2019-031963.draft_revisions.pdf]

# BMJ Open

BMJ Open is committed to open peer review. As part of this commitment we make the peer review history of every article we publish publicly available.

When an article is published we post the peer reviewers' comments and the authors' responses online. We also post the versions of the paper that were used during peer review. These are the versions that the peer review comments apply to.

The versions of the paper that follow are the versions that were submitted during the peer review process. They are not the versions of record or the final published versions. They should not be cited or distributed as the published version of this manuscript.

BMJ Open is an open access journal and the full, final, typeset and author-corrected version of record of the manuscript is available on our site with no access controls, subscription charges or pay-per-view fees (<http://bmjopen.bmj.com>).

If you have any questions on BMJ Open's open peer review process please email [info.bmjopen@bmj.com](mailto:info.bmjopen@bmj.com)

# BMJ Open

## Urban environment and mental health: the NAMED project, a mixed method approach

|                               |                                                                                                                                                                                                                                                                                                                                                                                                                                                                                                                                                                                                                                                                                                                                                                                                                                                                                                                                                                                                                                                                                                                                                                                                                                                                                                                                                                                                                                                                                                                                                                                                                                                                                                                                                                                   |
|-------------------------------|-----------------------------------------------------------------------------------------------------------------------------------------------------------------------------------------------------------------------------------------------------------------------------------------------------------------------------------------------------------------------------------------------------------------------------------------------------------------------------------------------------------------------------------------------------------------------------------------------------------------------------------------------------------------------------------------------------------------------------------------------------------------------------------------------------------------------------------------------------------------------------------------------------------------------------------------------------------------------------------------------------------------------------------------------------------------------------------------------------------------------------------------------------------------------------------------------------------------------------------------------------------------------------------------------------------------------------------------------------------------------------------------------------------------------------------------------------------------------------------------------------------------------------------------------------------------------------------------------------------------------------------------------------------------------------------------------------------------------------------------------------------------------------------|
| Journal:                      | <i>BMJ Open</i>                                                                                                                                                                                                                                                                                                                                                                                                                                                                                                                                                                                                                                                                                                                                                                                                                                                                                                                                                                                                                                                                                                                                                                                                                                                                                                                                                                                                                                                                                                                                                                                                                                                                                                                                                                   |
| Manuscript ID                 | bmjopen-2019-031963                                                                                                                                                                                                                                                                                                                                                                                                                                                                                                                                                                                                                                                                                                                                                                                                                                                                                                                                                                                                                                                                                                                                                                                                                                                                                                                                                                                                                                                                                                                                                                                                                                                                                                                                                               |
| Article Type:                 | Protocol                                                                                                                                                                                                                                                                                                                                                                                                                                                                                                                                                                                                                                                                                                                                                                                                                                                                                                                                                                                                                                                                                                                                                                                                                                                                                                                                                                                                                                                                                                                                                                                                                                                                                                                                                                          |
| Date Submitted by the Author: | 28-May-2019                                                                                                                                                                                                                                                                                                                                                                                                                                                                                                                                                                                                                                                                                                                                                                                                                                                                                                                                                                                                                                                                                                                                                                                                                                                                                                                                                                                                                                                                                                                                                                                                                                                                                                                                                                       |
| Complete List of Authors:     | <p>Lauwers, Laura; University of Antwerp Faculty of Medicine and Health Sciences, Department of Primary and Interdisciplinary Care</p> <p>Trabelsi, Sonia; Université catholique de Louvain, Center for Operations Research and Econometrics</p> <p>Pelgrims, Ingrid; Sciensano, Department of Risk and Health Impact Assessment</p> <p>Bastiaens, Hilde; University of Antwerp Faculty of Medicine and Health Sciences, Department of Primary and Interdisciplinary Care</p> <p>De Clercq, Eva ; Sciensano, Department of Risk and Health Impact Assessment</p> <p>Guilbert, Ariane ; Sciensano, Department of Risk and Health Impact Assessment</p> <p>Guyot, Madeleine; Université catholique de Louvain, Center for Operations Research and Econometrics</p> <p>Leone, Michael; Research Institute for Nature and Forest, Nature and Society Team</p> <p>Mortelmans, Dieter; Research Institute for Nature and Forest, Nature and Society Team</p> <p>Nawrot, Tim; Hasselt University, Centre for Environmental Sciences; Catholic University College Leuven, Department of Public Health and Primary Care</p> <p>Van Nieuwenhuysse, An; Laboratoire National de Santé, Department of Health Protection</p> <p>Remmen, Roy; University of Antwerp, Faculty of Medicine and Health Sciences, Department of Primary and Interdisciplinary Care</p> <p>Saenen, Nelly; Hasselt University, Centre for Environmental Sciences</p> <p>Thomas, Isabelle; Université catholique de Louvain, Center for Operations Research and Econometrics</p> <p>Keune, Hans; University of Antwerp Faculty of Medicine and Health Sciences, Department of Primary and Interdisciplinary Care; Research Institute for Nature and Forest, Belgian Biodiversity Platform, Nature and Society Team</p> |
| Keywords:                     | urban environment, MENTAL HEALTH, mixed method, built and non-built environment, air and noise pollution                                                                                                                                                                                                                                                                                                                                                                                                                                                                                                                                                                                                                                                                                                                                                                                                                                                                                                                                                                                                                                                                                                                                                                                                                                                                                                                                                                                                                                                                                                                                                                                                                                                                          |
|                               |                                                                                                                                                                                                                                                                                                                                                                                                                                                                                                                                                                                                                                                                                                                                                                                                                                                                                                                                                                                                                                                                                                                                                                                                                                                                                                                                                                                                                                                                                                                                                                                                                                                                                                                                                                                   |

1  
2  
3  
4  
5  
6  
7  
8  
9  
10  
11  
12  
13  
14  
15  
16  
17  
18  
19  
20  
21  
22  
23  
24  
25  
26  
27  
28  
29  
30  
31  
32  
33  
34  
35  
36  
37  
38  
39  
40  
41  
42  
43  
44  
45  
46  
47  
48  
49  
50  
51  
52  
53  
54  
55  
56  
57  
58  
59  
60

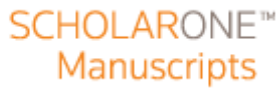

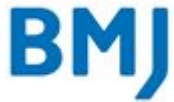

I, the Submitting Author has the right to grant and does grant on behalf of all authors of the Work (as defined in the below author licence), an exclusive licence and/or a non-exclusive licence for contributions from authors who are: i) UK Crown employees; ii) where BMJ has agreed a CC-BY licence shall apply, and/or iii) in accordance with the terms applicable for US Federal Government officers or employees acting as part of their official duties; on a worldwide, perpetual, irrevocable, royalty-free basis to BMJ Publishing Group Ltd ("BMJ") its licensees and where the relevant Journal is co-owned by BMJ to the co-owners of the Journal, to publish the Work in this journal and any other BMJ products and to exploit all rights, as set out in our [licence](#).

The Submitting Author accepts and understands that any supply made under these terms is made by BMJ to the Submitting Author unless you are acting as an employee on behalf of your employer or a postgraduate student of an affiliated institution which is paying any applicable article publishing charge ("APC") for Open Access articles. Where the Submitting Author wishes to make the Work available on an Open Access basis (and intends to pay the relevant APC), the terms of reuse of such Open Access shall be governed by a Creative Commons licence – details of these licences and which [Creative Commons](#) licence will apply to this Work are set out in our licence referred to above.

Other than as permitted in any relevant BMJ Author's Self Archiving Policies, I confirm this Work has not been accepted for publication elsewhere, is not being considered for publication elsewhere and does not duplicate material already published. I confirm all authors consent to publication of this Work and authorise the granting of this licence.

1  
2  
3 **Urban environment and mental health: the NAMED project, a mixed method**  
4 **approach**  
5

6 Laura Lauwers, Sonia Trabelsi, Ingrid Pelgrims, Hilde Bastiaens, Eva M De Clercq,  
7 Ariane Guilbert, Madeleine Guyot, Michael Leone, Dieter Mortelmans, Tim Nawrot, An  
8 Van Nieuwenhuyse, Roy Remmen, Nelly Saenen, Isabelle Thomas, Hans Keune  
9

10  
11 **Corresponding author:**  
12

13 Laura Lauwers  
14 Department of Primary and Interdisciplinary Care  
15 Faculty of Medicine and Health Sciences  
16 University of Antwerp  
17 Gouverneur Kinsbergencentrum 00.58.  
18 Doornstraat 331  
19 Wilrijk, 2610  
20 Belgium  
21 Phone: 32 489097822  
22 Email: laura.lauwers@uantwerpen  
23  
24  
25

26 **First authors and associations:**  
27

28 Laura Lauwers  
29 laura.lauwers@uantwerpen.be  
30 Department of Primary and Interdisciplinary Care, Faculty of Medicine and Health  
31 Sciences, University of Antwerp, Antwerp, Belgium  
32  
33

34 Sonia Trabelsi  
35 s.trabelsi@uclouvain.be  
36 Center for Operations Research and Econometrics, Université catholique de Louvain,  
37 Louvain-la-Neuve, Belgium  
38  
39

40 Ingrid Pelgrims  
41 Ingrid.Pelgrims@sciensano.be  
42 Department of Risk and Health Impact Assessment, Sciensano, Brussels, Belgium  
43  
44

45 **Co-authors**  
46

47 Hilde Bastiaens  
48 hilde.bastiaens@uantwerpen.be  
49 Department of Primary and Interdisciplinary Care, Faculty of Medicine and Health  
50 Sciences, University of Antwerp, Antwerp, Belgium  
51  
52

53 Eva M De Clercq  
54 Eva.DeClercq@sciensano.be  
55 Department of Risk and Health Impact Assessment, Sciensano, Brussels, Belgium  
56  
57

58 Ariane Guilbert  
59 aguilbert.prof@laposte.net  
60 Department of Risk and Health Impact Assessment, Sciensano, Brussels, Belgium

1  
2  
3  
4 Madeleine Guyot  
5 madeleine.guyot@uclouvain.be  
6 Center for Operations Research and Econometrics, Université catholique de Louvain,  
7 Louvain-la-Neuve, Belgium  
8  
9

10 Michael Leone  
11 michael.leone@inbo.be  
12 Nature and Society Team, Research Institute for Nature and Forest (INBO), Brussels,  
13 Belgium  
14

15 Dieter Mortelmans  
16 dieter.mortelmans@inbo.be  
17 Nature and Society Team, Research Institute for Nature and Forest (INBO), Brussels,  
18 Belgium  
19  
20

21 Tim Nawrot  
22 tim.nawrot@uhasselt.be  
23 Centre for Environmental Sciences, Hasselt University, Hasselt, Belgium  
24 Department of Public Health and Primary Care, Leuven University, Leuven, Belgium  
25  
26

27 An Van Nieuwenhuysse  
28 An.vanNieuwenhuysse@lns.etat.lu  
29 Laboratoire National de Santé, Department of Health Protection, Dudelange,  
30 Luxembourg  
31  
32

33 Roy Remmen  
34 roy.remmen@uantwerpen.be  
35 Department of Primary and Interdisciplinary Care, Faculty of Medicine and Health  
36 Sciences, University of Antwerp, Antwerp, Belgium  
37  
38

39 Nelly Saenen  
40 nelly.saenen@uhasselt.be  
41 Centre for Environmental Sciences, Hasselt University, Hasselt, Belgium  
42  
43

44 Isabelle Thomas  
45 isabelle.thomas@uclouvain.be  
46 Center for Operations Research and Econometrics, Université catholique de Louvain,  
47 Louvain-la-Neuve, Belgium  
48

49 Hans Keune  
50 hans.keune@inbo.be  
51 Belgian Biodiversity Platform, Nature and Society Team, Research Institute for Nature  
52 and Forest (INBO), Brussels, Belgium  
53 Chair Care and the Natural Living Environment, Department of Primary and  
54 Interdisciplinary Care, Faculty of Medicine and Health Sciences, University of Antwerp,  
55 Antwerp, Belgium  
56  
57

58 **Word count: 3850**  
59  
60

## ABSTRACT

**Introduction:** Mental health issues appear as a growing problem in modern societies and tend to be more frequent in big cities. Where increased evidence exists for positive links between nature and mental health, associations between urban environment characteristics and mental health are still not well understood. These associations are highly complex and require an interdisciplinary and integrated research approach to cover the broad range of mitigating factors. This article presents the study protocol of a project called NAMED that aims to generate a more complete understanding of associations between mental health and the urban environment.

**Methods and analysis:** Following a mixed method approach, this project combines quantitative and qualitative research. In the quantitative part, data on Brussels' (non)-built environment, air and noise pollution are coupled to data of the national health interview survey. Linkage is done at individual level. We analyze relationships between mental health and urban environment indicators using multivariate regression models, taking respondents' socio-economic status, lifestyle, age, and gender into account. We assess the mediating role of physical activity, social life, noise and air pollution in associations between mental health and (non)-built environment using structural equation modelling. In the qualitative part, we conduct interviews with Brussels residents to record individual perceptions on associations between urban environment and mental health. We apply a thematic analysis on transcripts of the audio-recorded interviews. In the validation part, results from these two approaches are triangulated and evaluated through interviews and focus groups with stakeholders of healthcare and urban planning sectors.

**Ethics and dissemination:** The Privacy Commission of Belgium and ethical committee from University Hospital of Antwerp respectively approved quantitative database merging and qualitative interviewing. We will share project results with a wide audience including the scientific community, policy authorities and civil society through scientific and non-expert communication.

**Keywords:** urban environment; mental health; mixed method; built and non-built environment; air pollution; noise pollution

## ARTICLE SUMMARY

### Strengths and limitations of this study

- The NAMED project mixes quantitative and qualitative methods to obtain a more comprehensive understanding of the association between urban environment and mental health.
- The NAMED project applies and combines a variety of indicators for mental health and the urban environment to investigate various components of mental health with differences in severity and various aspects of the urban environment to create a more detailed description of the surroundings of urban dwellers, closer to individual perceptions.
- The NAMED project couples urban environment indicators and mental health indicators at individual level to capture the complexity of this relationship influenced by very local environmental factors and individual attributes.
- The NAMED project includes a validation phase in which key stakeholders and experts can evaluate the quality of the project and direct outcomes relevant from a societal practice perspective.
- The NAMED project intends to draw general conclusions and recommendations, but due to limitation in time and space, some outcomes are expected to be context-specific and not applicable in the long-term.



## INTRODUCTION

According to the World Health Organisation (WHO) depression alone affects around 300 million people worldwide.<sup>1</sup> In Belgium, the Health Interview Survey (HIS) underlined a deterioration of the psycho-emotional health of the population: the proportion of respondents presenting psychological difficulties increased from 25% to 32% between 2008 and 2013. These included anxiety, depressive disorder, or sleep disorders. Strikingly, these are more prevalent in the Brussels-Capital Region (40%) than in the two other Regions Wallonia (35%) and Flanders (29%).<sup>2</sup>

It is now well-established that the nature, prevalence, and age of onset of mental disorders vary according to demographic, socioeconomic, and cultural factors.<sup>2-6</sup> Several international studies analyzed links between the urban environment and mental health from different research angles by looking at the urban social or physical environment.<sup>7</sup> The occurrence of psychosocial difficulties in Belgium is generally higher in cities.<sup>7-10</sup>

Concentrations of low socio-economic status, low social capital, or social segregation have been studied as social risk factors for mental health in cities.<sup>7,8</sup> Associations between the physical environment and mental health have been investigated in terms of noise pollution, air pollution, and urban design.<sup>11-13</sup> Regarding the latter, several studies highlighted positive associations between urban green and blue spaces and psychological, emotional, mental health, or stress reduction.<sup>14</sup> Others studied associations between mental health and the built environment in terms of walkability, access to care, and housing quality.<sup>15-17</sup> For instance, increased walkability has been associated with a decreased incidence of depression and enhanced physical activity.<sup>15,16</sup>

Conclusions tend however to differ or to be contradictory across studies as most studies relating the urban environment to mental health rely on a limited and different set of indicators. Most of the studies use a single indicator such as the “General Health Questionnaire 12” (GHQ-12 items) to describe mental health which makes it difficult to grasp diverse degrees of severity and to compare across studies.<sup>7,14</sup> Studies tend to investigate only one aspect of the urban environment, such as urban green space, overlooking the complexity of the urban landscape.<sup>18</sup> Studies relating urban green spaces to health issues often rely on a “standard” set of measures (proximity and access to green) and vegetation data (i.e. Normalized Difference Vegetation Index) with the risk of oversimplifying the perceptions of urban dwellers of their environment.<sup>14</sup> Many studies only look at SES as a potential determinant for associations between urban environment and mental health and risk to miss other key factors.<sup>7,17</sup> Finally, little is known on how citizens themselves experience the urban environment in relation to their mental health. Considering the increasing urbanization worldwide, it becomes clear that further research on which characteristics of the urban environment may be beneficial or detrimental for mental health, on pathways involved, and on the impact of social, economic, and cultural factors is needed.<sup>19</sup> In addition, there is a growing need to evaluate the quality and relevance of research results for practice.

The Nature Impact on Mental Health Distribution (NAMED) is a Belgian four-year project (2017 – 2021) that aims to further investigate the associations and underlying mechanisms between mental health and urban environment. To overcome the weaknesses of conducting only qualitative research, where the results cannot be

1  
2  
3 generalized, or only quantitative research, where individual understanding of these  
4 associations is limited, the project applies a mixed method approach, integrating  
5 qualitative and quantitative approaches. The qualitative research involves interviews  
6 with urban dwellers with the goal to analyze how they describe and experience the  
7 urban environment in relation to mental health. The quantitative research relies on  
8 data collected within the HIS and investigates how the (non-)built environment, air and  
9 noise pollution intertwine and relate to mental health, taking socioeconomic and  
10 lifestyle factors into account. To do so, we adapt, develop and combine a broad set of  
11 indicators to overcome the limitations of previous research. Eventually, in a validation  
12 stage, we discuss and evaluate together with experts and stakeholders the qualitative  
13 and quantitative results. The mixed method approach presented in this paper is  
14 conducted by a multidisciplinary team, including epidemiologists, geographers, general  
15 practitioners, and environmental and social scientists. The integration of both research  
16 parts will result in a comprehensive understanding of urban determinants of mental  
17 health, from individual to community scales.

18  
19  
20  
21 Based on the research results, NAMED intends to draw recommendations for urban  
22 planning, health management, and policy. As representatives of the medical  
23 community are involved throughout the project, we expect the conclusions of NAMED  
24 to guide health practices in understanding better the role of the environment among  
25 factors affecting mental health. Additionally, NAMED will make suggestions for  
26 extension of the HIS (new approaches derived from the qualitative methods, new  
27 wordings or new questions relating to urban environment and mental health). Besides,  
28 the involvement of representatives of the urban planning sectors will guide a better  
29 integration of mental health issues in new urban development projects in order to  
30 elaborate more health-promoting cities.

## 31 32 33 **METHODOLOGY**

### 34 35 **Study area**

36  
37  
38 The study area is the Brussels-Capital Region (BCR). The BCR is one of the three  
39 administrative Regions of Belgium (besides Wallonia and Flanders) and comprises 19  
40 municipalities. The BCR is 161.38 km<sup>2</sup> large and counts 1 198 726 inhabitants  
41 (01/01/2018) which means an average density of 7 428 inhabitants/km<sup>2</sup>.<sup>20</sup> The BCR is  
42 the headquarter of several Belgian and European institutions as well as international  
43 companies. It can be considered as a green urban region as 54% of its surface area is  
44 covered by vegetation (forest, public green spaces, urban trees, private gardens, green  
45 boulevards, etc.).<sup>21</sup> However, a clear contrast in vegetation cover exists between the  
46 center and the outer parts of the Region. Besides difference in access to green, the  
47 neighborhoods are highly diverse in population density, median income, household  
48 composition, etc. BCR is also characterized by a high cultural diversity (40% non-  
49 belgian nationality and a mixed use of language (most spoken: French, English,  
50 Flemish and Arabic).<sup>20,22</sup>

### 51 52 53 **Mixed method approach**

54  
55  
56  
57 The NAMED project is structured into two parts in a convergent parallel design:  
58  
59  
60

1  
2  
3 The quantitative research part uses the data collected within the Belgian HIS in 2008  
4 and 2013. It consists in (1) retrieving HIS respondents' home address, (2) developing  
5 relevant indicators characterizing each home addresses in terms of (non-)built  
6 environment, air and noise pollution using Geographical Information Systems (GIS)  
7 and (3) coupling these environmental indicators with HIS data. Based on this enriched  
8 database, this part investigates then associations between mental health and urban  
9 environment in a cross-sectional way, taking into account demographic,  
10 socioeconomic and lifestyle factors. The qualitative research part interviews Brussels  
11 inhabitants from different neighborhoods on how they experience their living  
12 environment in relation to what they express as their mental health.  
13  
14

15  
16 This mixed method approach is conducted by combining disciplines and requires a  
17 constant interaction between the different researchers in order to adapt their  
18 investigations to others' findings. The main level of interaction between the quantitative  
19 and qualitative research part occurs at the results interpretation step which allows to  
20 investigate if the citizen's perceptions on the association between urban environment  
21 and mental health converge or diverge from quantitative findings. Following research  
22 questions are addressed:  
23

- 24 · How does the urban environment associate to mental health according to objective  
25 indicators?
- 26 · How does the urban environment associate to mental health according to subjective  
27 experiences?
- 28 · How do the outcomes of both approaches diverge or converge?  
29

## 30 **The quantitative research part**

### 31 1. Study population

32  
33 The study population for the quantitative part consists of the inhabitants of the BCR  
34 aged 15 and older who participated in the HIS in 2008 (n = 2831) or in 2013 (n = 2532).  
35 The HIS is a re-occurring national cross-sectional epidemiological survey carried out  
36 by the Belgian research institute for health (Sciensano) in partnership with the Belgian  
37 statistical office (Statbel). It has been organized every five years since 1997. For each  
38 survey, approximately 10 000 individuals are selected from the National Register  
39 based on a random sampling scheme stratified by Region (including 3000 individuals  
40 from the BCR) and province, ensuring representativity for the Belgian population. Any  
41 person officially living in Belgium is likely to be selected.  
42  
43  
44  
45

### 46 2. Data collection and indicators selection

#### 47 *Mental health, socioeconomic, lifestyle and perceived environmental data*

48  
49 During each survey, detailed information is collected through face-to-face and self-  
50 administered questionnaires. The face-to-face questionnaire collects information on  
51 general health status, reduced mobility, use of health care services, socio-economic  
52 status, nutrition, and perception on environmental characteristics, such as air pollution  
53 and noise disturbance. The self-administered questionnaire is used to collect data on  
54 mental health and on sensitive topics, such as alcohol and drug use. Both  
55 questionnaires include questions adapted from validated screening tools. A description  
56 of the questionnaires can be found online.<sup>23</sup> The HIS is rich in terms of population  
57  
58  
59  
60

1  
2  
3 coverage, representativity, and information provision. Mental health, socioeconomic  
4 information, lifestyle, and perceived environmental data are retrieved from the Belgian  
5 HIS. The selection of relevant indicators for the NAMED project, is based on a literature  
6 review, on the variables distribution and on a factor analysis of mixed data (FAMD) on  
7 all mental health variables. Thus, the mental health status of each HIS respondent is  
8 described by following indicators:  
9

- 10 · The prevalence of psychological distress across the population. This categorical  
11 indicator is based on the “General Health Questionnaire 12” for general well-being.
- 12 · The respondents’ energy level is based on the “Vitality scale (VT-4 items) for  
13 positive mental health” from the Short-Form Health Survey (SF-36). This index  
14 containing four items measures the respondents’ vital energy level and is used to  
15 assess the positive dimension of mental health. This score is recommended by the  
16 EUROHIS2 (European project on developing common instruments for health  
17 surveys).
- 18 · The prevalence of anxiety disorders, the prevalence of depressive disorders, and  
19 the prevalence of sleeping disorders. These dichotomized indicators are based on  
20 the SCL-90-R subscales (42 items) for depression, anxiety, and sleeping problems.
- 21 · The subjective health, the reported depression in the past 12 months and the  
22 reported suicidal ideation in the past 12 months based on isolated variables.
- 23 · Indicators on risky behaviours are also considered through variables related to  
24 addictive substances consumption (“Problematic alcohol consumption” and  
25 “Lifetime prevalence of cannabis use”).

26 This rich data set allows to consider various components of mental health and diverse  
27 degrees of severity. The use of these standardized variables facilitates comparisons  
28 across studies.  
29

30  
31  
32 To describe respondents’ socio-economic status, six indicators are selected: age,  
33 gender, country of birth, household composition, highest educational level within the  
34 household, professional activity, employment status, and reported household income.  
35 Regarding respondents’ lifestyle, five indicators are selected: appreciation of social life,  
36 level of health enhancing physical activity, BMI, reported problems in mobility, and  
37 presence of one or more long standing illnesses, chronic conditions, or handicaps.  
38 These data allow to investigate the underlying mechanisms by which the urban  
39 environment associates with mental health.  
40  
41  
42

43 Respondents’ perception of environmental problems at their residence is approached  
44 through 18 indicators in three different domains.

- 45 · Nuisance in the neighborhood is described by: traffic volume, traffic speed,  
46 accumulation of rubbish, vandalism, graffiti or deliberate damage of property, and  
47 lack of access to parks or other green or recreational public places;
- 48 · Nuisance at home is characterized by: air pollution, bad smell from industry, bad  
49 smell from others sources (sewer, waste, etc.), vibrations from road, metro, tram,  
50 train, or air traffic, noise from road, train, tram, metro, air traffic, or factories, and  
51 neighborhood noise;
- 52 · Problems linked to the dwelling are approached by: unable to keep the home warm  
53 enough in the winter, problem of humidity or mould in the dwelling, smoke inside  
54 the dwelling every day or almost every day, and overcrowded household.

55 These indicators potentially contain information on environmental degradations not  
56 captured by GIS data and provide a good opportunity to assess the level of  
57 environmental stress felt by the respondents.  
58  
59  
60

### *Built and non-built environment data*

The NAMED project focuses on the health impact of outdoor environment including buildings, infrastructures, and green environment. We study the built environment in terms of building structures (their 2D footprint, spatial organization, height, type, etc.). We describe the non-built environment by two separate elements: the street network supporting daily mobility and the green environment including urban trees, open green public spaces, and private gardens.

We make use of two datasets available for the BCR: an open database, called UrbIS (CIRB-CIBG 2016) provides a set of cartographic data specific to the Region, and Brussels-Environment (the local environment and energy administration) provides vegetation data, as adapted in Van de Voorde et al. (2010).<sup>21,24</sup> We process these data using GIS to provide indicators on (non-)built environment to describe the surrounding environment of each HIS respondent. We develop indicators at three different scales in order to capture a variety of spatial characteristics that can influence the HIS respondents' perception of their environment and their wellbeing:

- At the scale of the building of the respondent: view of green and garden coverage;
- At the scale of the street in which the respondent lives: canyon or street corridor effect, linear density of urban trees, and visible street vegetation coverage;
- At the scale of the neighborhood of the respondent (600m and 1000m): typology of urban fabric, green coverage, accessibility and quality of green coverage, and sidewalk coverage.

### *Air quality data*

Data on HIS respondents' exposure to air pollution are obtained through the national monitoring system supervised by the Belgian interregional environment agency (IRCEL - CELINE). Measurements rely on a dense network of stations distributed all over the country. They assess on a daily basis concentrations of various pollutants which are then interpolated to estimate very local exposure (taking into account land cover data in combination with a dispersion model).<sup>25,26</sup> Saenen et al (2017) demonstrated the accuracy of the model to estimate a person's real exposure by showing that modelled particulate matter (PM<sub>2.5</sub>) and black carbon (BC) at the residence correlates with internal exposure to nanosized BC particles measured in urine.<sup>27</sup> We use annual averages of PM<sub>10</sub>, PM<sub>2.5</sub>, BC, ozone (O<sub>3</sub>) and nitrogen dioxide (NO<sub>2</sub>) exposure levels (µg/m<sup>3</sup>) at HIS respondents' home address as indicators for air quality.

### *Noise data*

Noise information is derived from the European NOISE database, a system supervised by the European Commission (directive 2002/49/EC, 2002). It aims at identifying and mapping noise and allows an assessment of population exposure across Europe according to standardized procedures, including harmonized noise indicators: day-evening-night noise level (Lden) and night noise level (Lnight). Since 2002, measures are done for urban areas counting more than 200 000 inhabitants, every five years, at the most exposed façades of buildings. We adapt Lden and Lnight as indicators to estimate traffic noise levels in 5 dB(A)-intervals.

### 3. Data analysis

In a first step, we take full advantage of the HIS dataset itself by investigating the associations between indicators describing the respondents' mental health and indicators describing the respondents' perceived environment, socio-economic and lifestyle data through bivariate analyses. Additionally, we describe the distribution of socioeconomic status across environmental indicators in order to assess potential "environmental inequalities". These descriptive analyses permit to identify potential vulnerable groups (likely and among others: socially deprived, isolated persons, teenagers) that should receive a greater attention. The first step results in crude distribution patterns to be further investigated with more complex statistical techniques in the second step.

In a second step, we merge the database with environmental indicators as previously described with individual data of HIS respondents. Linkage is done at the individual level and implies to temporarily geo-locate the home address of all respondents ("x,y" coordinates) at the time they participated in the survey. Based on the merged dataset and mental health indicators as previously described, we analyze relationships between mental health and urban environment characteristics using multivariate regression models adjusted for respondents' socio-economic status, lifestyle and stratified by age and gender. We use structural equation modelling which provides a flexible framework for performing mediation analysis to assess the potential mediating role of physical activity, social life, and noise and air pollution in the associations between mental health and (non-)built environment.<sup>28</sup> We check results for robustness with sensitivity analyses.

In a third step, we compare differences between respondents' perception and objective environmental indicators (related to air and noise pollution and lack of access to parks) of their environment through a Test de Student for comparison of means to assess the share of subjectivity in respondents' answers.

### 4. Data protection

All institutions handling data ensure their protection against leak, theft, misuse or degradation. In addition to current protection measures already implemented to protect HIS data, we consider and discuss additional controls such as specific encryption and special back up with the ICT team and Data Safety Advisor.

## **The qualitative research part**

Grounded theory methodology, as originally developed by Glaser and Strauss (1967) informed the plan of the qualitative research part for this study.<sup>29</sup> This part involves a generic qualitative approach from a constructivist perspective.<sup>30</sup>

#### 1. Study population

We conduct interviews with urban dwellers in various areas of the BCR representing a diversity in typology of urban fabric, access to green, median income, and population density. We recruit participants through several local organizations and initiatives which have often established familiar relationships with their members. This

1  
2  
3 recruitment strategy intends to reach a varied sample in terms of gender, age, cultural  
4 and socioeconomic backgrounds. Only participants with skills in Dutch, French or  
5 English and a minimum age of 18 years can participate. Based on sample size  
6 recommendations for grounded theory, the sample is estimated to consist of 30  
7 participants.<sup>31</sup>  
8

## 9 10 2. Data collection

11  
12 We invite the participants for semi-structured interviews, which consist in an open  
13 discussion following a framework of topics to be explored.<sup>32</sup> Although we developed  
14 this framework in advance, the open method allows to add new ideas brought in by the  
15 interviewees. These discussions take the form of a walking interview. This approach,  
16 also called go-along or walk-along interview, provides detailed insights into the  
17 meanings and practices people associate with their living environment.<sup>33</sup> Furthermore,  
18 it helps to reduce steering the conversation by the interviewer and the typical power  
19 dynamics that exist between the interviewer and interviewee.<sup>34</sup>  
20  
21

## 22 23 3. Data analysis

24  
25 We apply a thematic analysis on transcripts of the audio-recorded interviews, involving  
26 a three-stage coding process: descriptive coding, interpretative coding, and finally  
27 coming to overarching themes and their relationships. We check the themes appearing  
28 in interviews from the same area and across different areas (in terms of typology of  
29 urban fabric, access to green, median income and population density) for similarities  
30 and differences in the perception and experiences of urban environment in relation  
31 to mental health.  
32

## 33 34 4. Data protection

35  
36 We pseudonymize the transcripts so the identity of the interviewed participants is not  
37 disclosed during the presentation of the research results.  
38

## 39 40 **The validation part**

### 41 42 1. Data triangulation

43  
44 Data triangulation is defined as “a process of validating research conclusions by  
45 examining a relationship from different methodological angles”.<sup>35</sup> Quantitative results  
46 are triangulated with qualitative results to get a better understanding of the  
47 associations between urban environment and mental health. The qualitative results  
48 can support a better understanding of mechanisms that underlie associations identified  
49 in the quantitative part. If both results provide at some points mutual confirmation, we  
50 can consider the results more valid.<sup>36</sup> In the case that results diverge from each other,  
51 new research questions and hypotheses can emerge.  
52  
53

### 54 55 2. Extended peer evaluation

56  
57 Throughout the project, we consult key stakeholders from local, regional, and national  
58 health and environment authorities and institutions and experts from the international  
59 research community. This allows to evaluate the quality of the project and produce  
60

1  
2  
3 outcomes relevant not only from a scientific perspective but also from a societal  
4 practice perspective. We consult these actors through individual interviews and focus  
5 groups. Involvement of experts and stakeholders through participatory processes is a  
6 well-established practice for environmental management and policy making.<sup>37-40</sup>  
7 Modern views on governance underline that managing the living environment is no  
8 longer solely seen as the sole responsibility of governmental institutions.<sup>38</sup> It is  
9 perceived more as an interplay of different societal actors, including governmental  
10 institutions, local communities, and professional and stakeholder groups.<sup>41</sup> When  
11 conducting and assessing research findings in the perspective of urban planning,  
12 health management, and policy recommendations, the involvement of a diversity of  
13 actors seems vital in order to have an encompassing and well-informed view.  
14  
15

## 16 **ETHICS AND DISSEMINATION**

17  
18  
19 Approval for the data merging in the quantitative research part has been given by the  
20 Privacy Commission of Belgium (19/01/2018, reference number 02/2018). The walking  
21 interview with Brussels residents in the qualitative research part has been approved  
22 by the ethical committee from the University Hospital of Antwerp (Alternative Ethical  
23 Review board of the University of Antwerp) (26/11/2018, reference number 18/44/503).  
24 We will present and discuss research results in the form of maps, explanatory models,  
25 and storytelling and share them with a wide audience including the scientific  
26 community, policy authorities, and the civil society through international peer-reviewed  
27 publications, scientific conferences, and non-expert communication. We will also make  
28 specific efforts to translate and communicate research results to the general public  
29 through media, non-profit organizations and specific events. The NAMED website  
30 <https://www.uantwerpen.be/en/projects/named/> will provide an overview of the project,  
31 progress, actualities and publications.  
32  
33

## 34 **ACKNOWLEDGEMENTS**

35  
36  
37 We express our gratitude to all members of the follow up committee who provide  
38 relevant input throughout the project. We acknowledge the full HIS team of Sciensano  
39 and the Belgian statistical office, Statbel, for their technical support during the process  
40 of database merging and linking.  
41  
42

## 43 **AUTHOR CONTRIBUTIONS**

44  
45 All authors contributed to the conception of the mixed method. LL, ST and IP  
46 contributed equally to the draft of the manuscript with critical revisions and appraisal  
47 from the other authors. All authors have read and approved the final version of the  
48 manuscript.  
49  
50

## 51 **FUNDING**

52  
53 This work was supported by the Belgian Federal Science Policy Office (BELSPO),  
54 grant number BR/175/A3/NAMED.  
55  
56

## 57 **DATA STATEMENT**

58  
59 No data are available.  
60



## PATIENT AND PUBLIC STATEMENT

For the qualitative part, local organizations and experts are involved to reflect on the interview design. The local organizations support participant recruitment by promoting the project to their members or visitors. The interviews involve a diverse sample of inhabitants of the Brussels Capital Region.

For the validation part, stakeholders and experts are invited for focus groups to discuss research results. Their inputs will support final reporting of the project results and implications.

## REFERENCES

1. World Health Organization. Mental disorders. WHO. 2018 Apr 9. <https://www.who.int/en/news-room/fact-sheets/detail/mental-disorders>
2. Drieskens S, Charafeddine R, Demarest S, Gisle L, Tafforeau J, Van der Heyden J. Health Interview Survey, Belgium, 1997 - 2001 - 2004 - 2008 - 2013: Health Interview Survey Interactive Analysis. Brussels: WIV-ISP. <https://hisia.wiv-isp.be/>
3. Regier DA, Farmer ME, Rae DS, et al. One-month prevalence of mental disorders in the United States and sociodemographic characteristics: the Epidemiologic Catchment Area study. *Acta Psychiatr Scand* 1993;88:35–47.
4. Alonso J, Angermeyer MC, Bernert S, et al. Prevalence of mental disorders in Europe: results from the European Study of the Epidemiology of Mental Disorders (ESEMeD) project. *Acta Psychiatr Scand* 2004;109:21–7.
5. Merikangas KR, He J, Burstein M, et al. Lifetime Prevalence of Mental Disorders in U.S. Adolescents: Results from the National Comorbidity Survey Replication–Adolescent Supplement (NCS-A). *J Am Acad Child Adolesc Psychiatry* 2010;49:980–9.
6. Bijl RV, Ravelli A, van Zessen G. Prevalence of psychiatric disorder in the general population: results of the Netherlands Mental Health Survey and Incidence Study (NEMESIS). *Soc Psychiatry Psychiatr Epidemiol* 1998;33:587–95.
7. Gruebner O, Rapp MA, Adli M, Kluge U, Galea S, Heinz A. Cities and Mental Health. *Dtsch Arztebl Int* 2017; 114: 121-7.
8. Desjarlais R, editor. World mental health: Problems and priorities in low-income countries. Oxford University Press, USA; 1995.
9. Patel V. Poverty, inequality and mental health in developing countries. In: Leon D, Walt G, editors. Poverty, inequality and health. Oxford: Oxford University Press; 2001. p. 247-62.
10. Vassos E, Pedersen CB, Murray RM, Collier DA, Lewis CM. Meta-analysis of the association of urbanicity with schizophrenia. *Schizophr Bull* 2012;38:1118-23
11. Ma J, Li C, Kwan MP, Chai Y. A Multilevel Analysis of Perceived Noise Pollution, Geographic Contexts and Mental Health in Beijing. *International journal of environmental research and public health* 2018;15:1479.
12. Buoli M, Grassi S, Caldiroli A et al. Is there a link between air pollution and mental disorders? *Environment international* 2018;118:154-68.

13. McCay L, Bremer I, Endale T, Jannati M, Yi J. Urban design and mental health. *Mental Health and Illness in the City* 2017:1-24.
14. Gascon M, Triguero-Mas M, Martínez D. Mental health benefits of long-term exposure to residential green and blue spaces: a systematic review. *International journal of environmental research and public health* 2015;12:4354-79.
15. Nutsford D, Pearson AL, Kingham S. An ecological study investigating the association between access to urban green space and mental health. *Public Health* 2013;127:1005–11.
16. Cohen-Cline H, Turkheimer E, Duncan GE. Access to green space, physical activity and mental health: a twin study. *J Epidemiol Community Health* 2015;69:523–9.
17. Evans GW. The built environment and mental health. *Journal of urban health* 2003;80:536-55.
18. Rautio N, Filatova S, Lehtiniemi H, Miettunen J. Living environment and its relationship to depressive mood: A systematic review. *International Journal of Social Psychiatry* 2018;64:92-103.
19. Hartig T, Mitchell R, de Vries S, et al. Nature and health. *Annu Rev Public Health* 2014;35:207–28.
20. statbel.fgov.be [Internet]. Brussels: Statbel, the Belgian statistical office; c2018. Available from: [statbel.fgov.be/en](http://statbel.fgov.be/en)
21. Van de Voorde T, Canters F, Chan JC. Mapping update and analysis of the evolution of non-built (green) spaces in the Brussels Capital Region. Final Report. Brussels: Cartography and GIS Research Group, Department of Geography, Vrije Universiteit Brussel; Dec 2010. Report No.: ActuaEvol/09
22. Hermia JP, Sierens A. Belges et étrangers en Région bruxelloise, de la naissance à aujourd'hui. IBSA Brussels. 2017 Aug 20. [http://ibsa.brussels/fichiers/publications/focus-de-libsa/focus\\_20\\_aout\\_2017](http://ibsa.brussels/fichiers/publications/focus-de-libsa/focus_20_aout_2017)
23. his.wiv-isp.be [Internet]. Brussels: Sciensano; c2019. Available from: <https://his.wiv-isp.be/SitePages/Questionnaires.aspx>
24. UrbIS data [Internet]. Brussels: CIRB-CIBG. c2019 - [cited 2019 May 6]. Available from: <https://cirb.brussels/fr/nos-solutions/urbis-solutions/urbis-data>
25. Janssen S, Dumont G, Fierens F, et al. Spatial interpolation of air pollution measurements using CORINE land cover data. *Atmos Environ* 2008;42:4884–903.
26. Lefebvre W, Degrawe B, Beckx C, et al. Presentation and evaluation of an integrated model chain to respond to traffic- and health-related policy questions. *Environ Model Softw* 2013;40:160–70.
27. Saenen ND, Bové H, Steuwe C et al. Children's urinary environmental carbon load. A novel marker reflecting residential ambient air pollution exposure? *American journal of respiratory and critical care medicine* 2017;196:873-81.
28. Gunzler D, Chen T, Wu P, et al. Introduction to mediation analysis with structural equation modeling. *Shanghai Arch Psychiatry* 2013;25:390–4.
29. Glaser BG, Strauss AL. Discovery of grounded theory: Strategies for qualitative research. Chicago: Aldine; 1967.
30. Kahlke RM. Generic qualitative approaches: Pitfalls and benefits of methodological mixology. *International Journal of Qualitative Methods* 2014;13:37-52.

- 1
- 2
- 3 31. Marshall B, Cardon P, Poddar A, Fontenot R. Does sample size matter in
- 4 qualitative research?: A review of qualitative interviews in IS research. *Journal*
- 5 *of Computer Information Systems* 2013;54:11-22.
- 6
- 7 32. Green J, Thorogood N. Qualitative methods for health research. London:
- 8 Sage; 2018.
- 9
- 10 33. O'Brien L, Morris J, Stewart A. Engaging with peri-urban woodlands in
- 11 England: the contribution to people's health and well-being and implications
- 12 for future management. *International journal of environmental research and*
- 13 *public health* 2014;11:6171-92.
- 14
- 15 34. Carpiano RM. Come take a walk with me: The "Go-Along" interview as a novel
- 16 method for studying the implications of place for health and well-being. *Health*
- 17 *& Place* 2009;15:263-272.
- 18
- 19 35. Molina-Azorin, J. F., Bergh, D. D., Corley, K. G., & Ketchen, D. J. (2017).
- 20 Mixed Methods in the Organizational Sciences: Taking Stock and Moving
- 21 Forward. *Organizational Research Methods*, 20(2), 179–192.
- 22
- 23 36. Molina-Azorin JF, Bergh DD, Corley KG, Ketchen DJ. Mixed methods in the
- 24 Organizational Sciences: Taking Stock and Moving Forward. *Organizational*
- 25 *Research Methods* 2017;20:179–192.
- 26
- 27 37. Renn O. Participatory processes for designing environmental policies. *Land*
- 28 *Use Policy* 2006;23:34–43.
- 29
- 30 38. Jordan A. The Governance of Sustainable Development: Taking Stock and
- 31 Looking Forwards. *Environ Plan C Gov Policy* 2008;26:17–33.
- 32
- 33 39. Reed MS. Stakeholder participation for environmental management: A
- 34 literature review. *Biol Conserv* 2008;141:2417–31.
- 35
- 36 40. Brown G, de Bie K, Weber D. Identifying public land stakeholder perspectives
- 37 for implementing place-based land management. *Landsc Urban Plan*
- 38 2015;139:1–15.
- 39
- 40 41. Hooghe L, Marks G. Unraveling the Central State, but How? Types of Multi-
- 41 Level Governance. *Am Polit Sci Rev* 2003;97:233–43.
- 42
- 43
- 44
- 45
- 46
- 47
- 48
- 49
- 50
- 51
- 52
- 53
- 54
- 55
- 56
- 57
- 58
- 59
- 60

# BMJ Open

## Urban environment and mental health: the NAMED project, protocol for a mixed method study

|                                 |                                                                                                                                                                                                                                                                                                                                                                                                                                                                                                                                                                                                                                                                                                                                                                                                                                                                                                                                                                                                                                                                                                                                                                                                                                                                                                                                                                                                                                                                                                                                                                                                                                                                                                                                                                        |
|---------------------------------|------------------------------------------------------------------------------------------------------------------------------------------------------------------------------------------------------------------------------------------------------------------------------------------------------------------------------------------------------------------------------------------------------------------------------------------------------------------------------------------------------------------------------------------------------------------------------------------------------------------------------------------------------------------------------------------------------------------------------------------------------------------------------------------------------------------------------------------------------------------------------------------------------------------------------------------------------------------------------------------------------------------------------------------------------------------------------------------------------------------------------------------------------------------------------------------------------------------------------------------------------------------------------------------------------------------------------------------------------------------------------------------------------------------------------------------------------------------------------------------------------------------------------------------------------------------------------------------------------------------------------------------------------------------------------------------------------------------------------------------------------------------------|
| Journal:                        | <i>BMJ Open</i>                                                                                                                                                                                                                                                                                                                                                                                                                                                                                                                                                                                                                                                                                                                                                                                                                                                                                                                                                                                                                                                                                                                                                                                                                                                                                                                                                                                                                                                                                                                                                                                                                                                                                                                                                        |
| Manuscript ID                   | bmjopen-2019-031963.R1                                                                                                                                                                                                                                                                                                                                                                                                                                                                                                                                                                                                                                                                                                                                                                                                                                                                                                                                                                                                                                                                                                                                                                                                                                                                                                                                                                                                                                                                                                                                                                                                                                                                                                                                                 |
| Article Type:                   | Protocol                                                                                                                                                                                                                                                                                                                                                                                                                                                                                                                                                                                                                                                                                                                                                                                                                                                                                                                                                                                                                                                                                                                                                                                                                                                                                                                                                                                                                                                                                                                                                                                                                                                                                                                                                               |
| Date Submitted by the Author:   | 15-Jan-2020                                                                                                                                                                                                                                                                                                                                                                                                                                                                                                                                                                                                                                                                                                                                                                                                                                                                                                                                                                                                                                                                                                                                                                                                                                                                                                                                                                                                                                                                                                                                                                                                                                                                                                                                                            |
| Complete List of Authors:       | <p>Lauwers, Laura; University of Antwerp Faculty of Medicine and Health Sciences, Department of Primary and Interdisciplinary Care</p> <p>Trabelsi, Sonia; Université catholique de Louvain, Center for Operations Research and Econometrics</p> <p>Pelgrims, Ingrid; Sciensano, Department of Risk and Health Impact Assessment</p> <p>Bastiaens, Hilde; University of Antwerp Faculty of Medicine and Health Sciences, Department of Primary and Interdisciplinary Care</p> <p>De Clercq, Eva ; Sciensano, Department of Risk and Health Impact Assessment</p> <p>Guilbert, Ariane ; Sciensano, Department of Risk and Health Impact Assessment</p> <p>Guyot, Madeleine; Université catholique de Louvain, Center for Operations Research and Econometrics</p> <p>Leone, Michael; Research Institute for Nature and Forest, Nature and Society Team</p> <p>Nawrot, Tim; Hasselt University, Centre for Environmental Sciences; Catholic University College Leuven, Department of Public Health and Primary Care</p> <p>Van Nieuwenhuysse, An; Laboratoire National de Santé, Department of Health Protection; Catholic University College Leuven, Department of Public Health and Primary Care</p> <p>Remmen, Roy; University of Antwerp, Faculty of Medicine and Health Sciences, Department of Primary and Interdisciplinary Care</p> <p>Saenen, Nelly; Hasselt University, Centre for Environmental Sciences</p> <p>Thomas, Isabelle; Université catholique de Louvain, Center for Operations Research and Econometrics</p> <p>Keune, Hans; University of Antwerp Faculty of Medicine and Health Sciences, Department of Primary and Interdisciplinary Care; Research Institute for Nature and Forest, Belgian Biodiversity Platform, Nature and Society Team</p> |
| <b>Primary Subject Heading</b>: | Mental health                                                                                                                                                                                                                                                                                                                                                                                                                                                                                                                                                                                                                                                                                                                                                                                                                                                                                                                                                                                                                                                                                                                                                                                                                                                                                                                                                                                                                                                                                                                                                                                                                                                                                                                                                          |
| Secondary Subject Heading:      | Research methods                                                                                                                                                                                                                                                                                                                                                                                                                                                                                                                                                                                                                                                                                                                                                                                                                                                                                                                                                                                                                                                                                                                                                                                                                                                                                                                                                                                                                                                                                                                                                                                                                                                                                                                                                       |
| Keywords:                       | urban environment, MENTAL HEALTH, mixed method                                                                                                                                                                                                                                                                                                                                                                                                                                                                                                                                                                                                                                                                                                                                                                                                                                                                                                                                                                                                                                                                                                                                                                                                                                                                                                                                                                                                                                                                                                                                                                                                                                                                                                                         |
|                                 |                                                                                                                                                                                                                                                                                                                                                                                                                                                                                                                                                                                                                                                                                                                                                                                                                                                                                                                                                                                                                                                                                                                                                                                                                                                                                                                                                                                                                                                                                                                                                                                                                                                                                                                                                                        |

1  
2  
3  
4  
5  
6  
7  
8  
9  
10  
11  
12  
13  
14  
15  
16  
17  
18  
19  
20  
21  
22  
23  
24  
25  
26  
27  
28  
29  
30  
31  
32  
33  
34  
35  
36  
37  
38  
39  
40  
41  
42  
43  
44  
45  
46  
47  
48  
49  
50  
51  
52  
53  
54  
55  
56  
57  
58  
59  
60

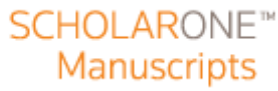

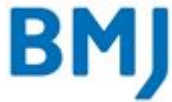

I, the Submitting Author has the right to grant and does grant on behalf of all authors of the Work (as defined in the below author licence), an exclusive licence and/or a non-exclusive licence for contributions from authors who are: i) UK Crown employees; ii) where BMJ has agreed a CC-BY licence shall apply, and/or iii) in accordance with the terms applicable for US Federal Government officers or employees acting as part of their official duties; on a worldwide, perpetual, irrevocable, royalty-free basis to BMJ Publishing Group Ltd ("BMJ") its licensees and where the relevant Journal is co-owned by BMJ to the co-owners of the Journal, to publish the Work in this journal and any other BMJ products and to exploit all rights, as set out in our [licence](#).

The Submitting Author accepts and understands that any supply made under these terms is made by BMJ to the Submitting Author unless you are acting as an employee on behalf of your employer or a postgraduate student of an affiliated institution which is paying any applicable article publishing charge ("APC") for Open Access articles. Where the Submitting Author wishes to make the Work available on an Open Access basis (and intends to pay the relevant APC), the terms of reuse of such Open Access shall be governed by a Creative Commons licence – details of these licences and which [Creative Commons](#) licence will apply to this Work are set out in our licence referred to above.

Other than as permitted in any relevant BMJ Author's Self Archiving Policies, I confirm this Work has not been accepted for publication elsewhere, is not being considered for publication elsewhere and does not duplicate material already published. I confirm all authors consent to publication of this Work and authorise the granting of this licence.

1  
2  
3 **Urban environment and mental health: the NAMED project, protocol for a mixed**  
4 **method study**  
5

6 Laura Lauwers, Sonia Trabelsi, Ingrid Pelgrims, Hilde Bastiaens, Eva M De Clercq,  
7 Ariane Guilbert, Madeleine Guyot, Michael Leone, Tim Nawrot, An Van Nieuwenhuyse,  
8 Roy Remmen, Nelly Saenen, Isabelle Thomas, Hans Keune  
9

10  
11 **Corresponding author:**  
12

13 Laura Lauwers  
14 Department of Primary and Interdisciplinary Care  
15 Faculty of Medicine and Health Sciences  
16 University of Antwerp  
17 Gouverneur Kinsbergencentrum 00.58.  
18 Doornstraat 331  
19 Wilrijk, 2610  
20 Belgium  
21 Phone: 32 489097822  
22 Email: laura.lauwers@uantwerpen  
23  
24  
25

26 **First authors and affiliations:**  
27

28 Laura Lauwers  
29 laura.lauwers@uantwerpen.be  
30 Department of Primary and Interdisciplinary Care, Faculty of Medicine and Health  
31 Sciences, University of Antwerp, Antwerp, Belgium  
32  
33

34 Sonia Trabelsi  
35 s.trabelsi@uclouvain.be  
36 Center for Operations Research and Econometrics, Université catholique de Louvain,  
37 Louvain-la-Neuve, Belgium  
38  
39

40 Ingrid Pelgrims  
41 Ingrid.Pelgrims@sciensano.be  
42 Department of Risk and Health Impact Assessment, Sciensano, Brussels, Belgium  
43  
44

45 **Co-authors**  
46

47 Hilde Bastiaens  
48 hilde.bastiaens@uantwerpen.be  
49 Department of Primary and Interdisciplinary Care, Faculty of Medicine and Health  
50 Sciences, University of Antwerp, Antwerp, Belgium  
51  
52

53 Eva M De Clercq  
54 Eva.DeClercq@sciensano.be  
55 Department of Risk and Health Impact Assessment, Sciensano, Brussels, Belgium  
56  
57

58 Ariane Guilbert  
59 aguilbert.prof@laposte.net  
60 Department of Risk and Health Impact Assessment, Sciensano, Brussels, Belgium

1  
2  
3  
4 Madeleine Guyot  
5 madeleine.guyot@uclouvain.be  
6 Center for Operations Research and Econometrics, Université catholique de Louvain,  
7 Louvain-la-Neuve, Belgium  
8  
9

10 Michael Leone  
11 michael.leone@inbo.be  
12 Nature and Society Team, Research Institute for Nature and Forest (INBO), Brussels,  
13 Belgium  
14

15  
16 Tim Nawrot  
17 tim.nawrot@uhasselt.be  
18 Centre for Environmental Sciences, Hasselt University, Hasselt, Belgium  
19 Department of Public Health and Primary Care, Leuven University, Leuven, Belgium  
20

21  
22 An Van Nieuwenhuysse  
23 An.vanNieuwenhuysse@Ins.etat.lu  
24 Laboratoire National de Santé, Department of Health Protection, Dudelange,  
25 Luxembourg  
26 Department of Public Health and Primary Care, University of Leuven, Belgium  
27

28  
29 Roy Remmen  
30 roy.remmen@uantwerpen.be  
31 Department of Primary and Interdisciplinary Care, Faculty of Medicine and Health  
32 Sciences, University of Antwerp, Antwerp, Belgium  
33

34  
35 Nelly Saenen  
36 nelly.saenen@uhasselt.be  
37 Centre for Environmental Sciences, Hasselt University, Hasselt, Belgium  
38

39  
40 Isabelle Thomas  
41 isabelle.thomas@uclouvain.be  
42 Center for Operations Research and Econometrics, Université catholique de Louvain,  
43 Louvain-la-Neuve, Belgium  
44

45  
46 Hans Keune  
47 hans.keune@inbo.be  
48 Belgian Biodiversity Platform, Nature and Society Team, Research Institute for Nature  
49 and Forest (INBO), Brussels, Belgium  
50 Chair Care and the Natural Living Environment, Department of Primary and  
51 Interdisciplinary Care, Faculty of Medicine and Health Sciences, University of Antwerp,  
52 Antwerp, Belgium  
53

54 **Word count: 4515**  
55  
56  
57  
58  
59  
60



## ABSTRACT

**Introduction:** Mental health issues appear as a growing problem in modern societies and tend to be more frequent in big cities. Where increased evidence exists for positive links between nature and mental health, associations between urban environment characteristics and mental health are still not well understood. These associations are highly complex and require an interdisciplinary and integrated research approach to cover the broad range of mitigating factors. This article presents the study protocol of a project called NAMED that aims to generate a comprehensive understanding of associations between mental health and the urban residential environment.

**Methods and analysis:** Following a mixed method approach, this project combines quantitative and qualitative research. In the quantitative part, we analyze among the Brussels urban population associations between the urban residential environment and mental health, taking respondents' socio-economic status and physical health into account. Mental health is determined by the mental health indicators in the national Health Interview Survey (HIS). The urban residential environment is described by subjective indicators for the participant's dwelling and neighborhood present in the HIS and objective indicators for buildings, network infrastructure, and green environment developed for the purpose of this project. We assess the mediating role of physical activity, social life, noise and air pollution. In the qualitative part, we conduct walking interviews with Brussels residents to record their subjective wellbeing in association with their neighborhood. In the validation part, results from these two approaches are triangulated and evaluated through interviews and focus groups with stakeholders of healthcare and urban planning sectors.

**Ethics and dissemination:** The Privacy Commission of Belgium and ethical committee from University Hospital of Antwerp respectively approved quantitative database merging and qualitative interviewing. We will share project results with a wide audience including the scientific community, policy authorities and civil society through scientific and non-expert communication.

**Keywords:** urban environment; mental health; mixed method; air pollution; noise pollution

## ARTICLE SUMMARY

### Strengths and limitations of this study

- The NAMED project mixes quantitative and qualitative methods to obtain a comprehensive understanding of the association between urban residential environment and mental health.
- The NAMED project investigates various components of mental health and of the urban residential environment using complementary indicators. However, only indicators describing the physical and not the social residential environment (such as neighborhood cohesion, neighborhood criminality) are considered.
- The NAMED project combines subjective and objective environmental indicators. However, the cross-sectional study design does not allow ruling out reverse causation for associations found between the subjective environmental and mental health measures.
- The NAMED project couples urban environment indicators and mental health indicators at individual level to capture the complexity of this relationship influenced by very local environmental factors and individual attributes. However, available data do not allow investigating other relevant environmental exposures than the one to the residential environment.
- The NAMED project includes a validation phase in which key stakeholders and experts can evaluate the methodological approach of the project and direct recommendations relevant from a societal practice perspective.

## INTRODUCTION

According to the World Health Organization (WHO) depression alone affects around 300 million people worldwide.[1] In Belgium, the Health Interview Survey (HIS) underlined a deterioration of the psycho-emotional health of the population: the proportion of respondents presenting psychological difficulties increased from 25% to 32% between 2008 and 2013. These included anxiety, depressive disorder, or sleep disorders. Strikingly, these are more prevalent in the Brussels-Capital Region (40%) than in the two other Regions Wallonia (35%) and Flanders (29%).[2]

It is now well-established that the nature, prevalence, and age of onset of mental disorders vary according to demographic, socioeconomic, and cultural factors.[2-6] Several international studies analyzed links between the urban environment and mental health from different research angles by looking at the urban social or physical environment.[7] With respect to the urban social environment, concentrations of low socio-economic status (SES), low social capital, or social segregation have been studied as social risk factors for mental health in cities.[7-9] Feelings of community attachment and social cohesion are shown to improve mental health, where neighborhood disorder, such as crime and violence, is associated with poor mental health.[9-15] In Belgium, the occurrence of psychosocial difficulties is generally higher in cities.[2]

Associations between the urban physical environment and mental health have been investigated in terms of urban design, noise pollution, and air pollution.[16-18] Regarding the urban design, evidence has increased on the positive impact of urban green and blue spaces on mental health.[16,19,20] After controlling for confounding factors, significant associations were found between (1) depression, anxiety, visits to mental health specialists, and stress and access to green space (2) between depression and park size (3) between depression, anxiety, perceived risk for poor mental health, and visits to mental health specialists and surrounding greenness and (4) between perceived mental health and perceived greenness. [21-26] Besides the natural environment, several studies investigated associations between mental health and the built environment in terms of walkability, access to care, and housing quality.[23,27,28] For instance, increased walkability has been associated with a decreased incidence of depression and enhanced physical activity.[23,27] Indoor and outdoor noise are found to be significantly associated with self-reported mental health problems or mental disorders.[13,16,29] Also air pollution has been found to be associated with depressive symptoms. However, many studies did not take into account confounding factors.[17,29]

Although a broad range of research has found some trends in associations between mental health and urban environment, conclusions still tend to differ or to be contradictory across studies.[12,20,29-31] This may be explained by different research limitations. First, most studies rely on a single indicator such as the "General Health Questionnaire 12" (GHQ-12 items) to describe mental health or focus on a single aspect such as depression.[7,9,14,20,29,32,33] This makes it difficult to grasp diverse degrees of severity and to compare across studies. Second, the strict use of subjective environmental measures in some studies make it difficult to conclude on whether participants with mental health issues are more likely to report negatively on their environment or that negative environmental aspects contribute to mental illnesses

1  
2  
3 (reverse causation).[10,12,14,15] Studies including objective environmental measures  
4 make often use of a limited set of indicators developed at census area unit level, which  
5 makes it difficult to compare results across different study contexts and reflect lived  
6 experiences of the residential urban environment.[14,16,20,32] Exposures to  
7 surrounding green, air pollution and other factors of the urban environment are  
8 generally spatially correlated.[34] However, most of the epidemiological studies  
9 assessing the relation between the urban environment and mental health have  
10 evaluated only one of these environmental exposures, ignoring the potential  
11 confounding or interaction effects between noise, air pollution and green space.  
12 Finally, a general restriction to quantitative methods limits the development of a  
13 comprehensive understanding of mechanisms underlying associations between the  
14 urban environment and mental health.[12,15,20] Considering the increasing  
15 urbanization worldwide, it becomes clear that further research on which characteristics  
16 of the urban environment may be beneficial or detrimental for mental health, on  
17 pathways involved, and on the impact of social, economic, and cultural factors is  
18 needed.[35] In addition, there is a growing need to evaluate the quality and relevance  
19 of research results for practice.  
20  
21  
22  
23  
24

25  
26 The Nature Impact on Mental Health Distribution (NAMED) is a Belgian four-year  
27 project (2017 – 2021) that aims to further investigate the associations and underlying  
28 mechanisms between mental health and urban residential environment in the Brussels  
29 Capital Region (BCR). To overcome the weaknesses of conducting only quantitative  
30 research, where individual understanding of these associations is limited, or only  
31 qualitative research, where the results cannot be generalized, the project applies a  
32 mixed method approach. In NAMED, the quantitative research relies on data collected  
33 within the HIS and analyzes associations between the urban residential environment  
34 and mental health, taking SES and physical health into account. To do so, we adapt,  
35 develop and combine a broad set of both subjective and objective indicators to  
36 overcome the limitations of previous research. We assess the mediating role of  
37 physical activity, social life, noise and air pollution in associations with mental health  
38 and urban environment. The qualitative research involves interviews with Brussels  
39 dwellers with the goal to analyze how they perceive and experience the urban  
40 environment in relation to mental health. The combined approach allows a better  
41 understanding of the underlying mechanisms, including direct effects (stress buffer,  
42 recovery, etc.), indirect effects (physical activity, social life, noise and air pollution) and  
43 impacts of individuals' perceptions and experiences.  
44  
45  
46  
47

48  
49 Eventually, in a validation stage, we discuss and evaluate together with experts and  
50 stakeholders the quantitative and qualitative results. The mixed method approach  
51 presented in this paper is conducted by a multidisciplinary team, including  
52 epidemiologists, geographers, general practitioners, and environmental and social  
53 scientists. The integration of both research parts will result in a comprehensive  
54 understanding of urban determinants of mental health, from individual to community  
55 scales. Based on the research results, NAMED intends to draw practice and policy  
56 recommendations for urban planning and health management. NAMED will make  
57 suggestions for extension of the HIS (new approaches derived from the qualitative  
58 methods, new wordings or new questions relating to urban environment and mental  
59 health). Besides, the involvement of representatives of the urban planning sectors will  
60

1  
2  
3 guide a better integration of mental health issues in new health-promoting urban  
4 development projects. The following research questions are addressed:

- 5 · Is there an association between the urban residential environment and mental  
6 health in the BCR using objective and subjective indicators? (Quantitative research  
7 part)
- 8 · How do people living in the BCR perceive and experience their urban residential  
9 environment in association with their mental health? (Qualitative research part)
- 10 · How can the project results contribute to practice and policy? (Validation part)

## 11 12 13 **METHODOLOGY**

### 14 15 **Study area**

16  
17  
18 The study area is the Brussels-Capital Region (BCR). The BCR is one of the three  
19 administrative Regions of Belgium (besides Wallonia and Flanders) and comprises 19  
20 municipalities. The restriction to the BCR is motivated by the high prevalence of mental  
21 health problems, but also by the large representativeness and distribution of the HIS  
22 participants for 2008 and 2013. The large cities in Flanders and Wallonia have much  
23 less HIS-participants than the BCR. Since we include qualitative interviews, it is not  
24 realistic to propose an investigation in the large cities of every region in Belgium. The  
25 focus on the BCR was also motivated by the available geographic data. Very detailed  
26 spatial information has been collected, digitized and made available to the general  
27 public for the BCR, which is not the case for the other regions of Belgium, Flanders  
28 and Wallonia. The existence of a rich dataset, both in HIS participation and geographic  
29 detail, was a strong argument for choosing BCR as our study region. The BCR is  
30 161.38 km<sup>2</sup> large and counts 1 198 726 inhabitants (01/01/2018) which means an  
31 average density of 7 428 inhabitants/km<sup>2</sup>.<sup>[36]</sup> It can be considered a green urban  
32 region as 54% of its surface area is covered by vegetation (forest, public green spaces,  
33 urban trees, private gardens, etc.).<sup>[37]</sup> However, a clear contrast in vegetation cover  
34 exists between the center and the outer parts of the Region. Besides difference in  
35 access to green, the neighborhoods are highly diverse in population density, median  
36 income, household composition, etc. BCR is characterized by a high cultural diversity  
37 (40% non-Belgian nationality) and a mixed use of language (most spoken: French,  
38 English, Flemish).<sup>[36,38]</sup>

### 39 40 41 42 43 **Mixed method approach**

44  
45  
46 The NAMED project applies a mixed method approach, combining quantitative and  
47 qualitative research structured into a convergent parallel design. This mixed method  
48 approach is conducted by combining disciplines and requires a constant interaction  
49 between the different researchers in order to adapt their investigations to others'  
50 findings. The main level of interaction between the quantitative and qualitative research  
51 part occurs at the results interpretation step, which allows to understand if qualitative  
52 findings converge or diverge from quantitative ones. Besides this data triangulation,  
53 the validation part also involves key stakeholders and experts to reflect throughout the  
54 project on scientific and practice relevance. The three research parts are explained in  
55 detail in following sections (Fig. 1).

56  
57  
58 Fig. 1 Schematic overview of the working plan of NAMED with the main characteristics  
59 of each research part.  
60

1  
2  
3  
4  
5  
6  
7  
8  
9  
10  
11  
12  
13  
14  
15  
16  
17  
18  
19  
20  
21  
22  
Mental health and the urban residential environment are approached in a complementary manner in both research parts. In the quantitative research part, mental health is determined by the mental health indicators for psychological distress, energy level, anxiety, depression, sleeping problems, suicidal ideation, addictive substance consumption present in the HIS. The urban residential environment is described by (1) self-reported assessment of participant's dwelling (such as humidity) and neighborhood (such as accumulation of rubbish) present in the HIS; (2) objective indicators for buildings, network infrastructure, and green environment developed for the purpose of this project. In the qualitative research part, mental health is assessed using the subjective wellbeing of the participants in association with their urban residential environment. The urban residential environment is covered by the subjective description of characteristics and places in the neighborhood that play an important role in the participant's wellbeing.

### 23 **The quantitative research part**

24  
25  
26  
27  
28  
29  
30  
31  
32  
33  
The quantitative research part uses the data collected within the Belgian HIS in 2008 and 2013. It consists in (1) retrieving HIS respondents' home address, (2) developing relevant indicators characterizing each home address in terms of urban environment, air and noise pollution using Geographical Information Systems (GIS) and (3) coupling these environmental indicators with HIS data. Based on this enriched database, this part investigates then the associations between mental health and urban environment in a cross-sectional way, taking into account socioeconomic and lifestyle factors.

#### 34 1. Study population

35  
36  
37  
38  
39  
40  
41  
42  
43  
44  
45  
46  
47  
The study population for the quantitative part includes the inhabitants of the BCR aged 15 and older who participated in the HIS in 2008 (n = 2 831) or in 2013 (n = 2 532). The HIS is a re-occurring national cross-sectional epidemiological survey carried out by the Belgian research institute for health (Sciensano) in partnership with the Belgian statistical office (Statbel). It has been organized every five years since 1997. For each survey, approximately 10 000 individuals are selected from the National Register based on a random sampling scheme stratified by Region (including 3 000 individuals from the BCR) and by Province, ensuring representativity of the Belgian population. Any person officially residing in Belgium is likely to be selected.

#### 48 2. Data collection and indicators selection

##### 49 *Mental health, socioeconomic, lifestyle and perceived environmental data*

50  
51  
52  
53  
54  
55  
56  
57  
58  
59  
60  
During each survey, detailed information is collected through face-to-face and self-administered questionnaires. The face-to-face questionnaire collects information on general health status, reduced mobility, use of health care services, SES, nutrition, and perception on environmental characteristics, such as air pollution and noise disturbance. The self-administered questionnaire is used to collect data on mental health and on sensitive topics, such as alcohol and drug use. Both questionnaires include questions adapted from validated screening tools. A description of the

questionnaires can be found online.[39] Mental health, SES, lifestyle, and perceived environmental data are retrieved from the Belgian HIS. The selection of relevant indicators for the NAMED project, is based on a literature review, on the variables distribution and on a factor analysis of mixed data (FAMD) on all mental health variables. We selected all the mental health indicators available in the HIS database that were based on internationally validated scales. We only excluded the eating disorders since it is a very specific disorder for which we did not find anything in the literature review. The indicator on suicidal attempts in the past 12 months was also excluded given the too few cases reported. Thus, the mental health status of each HIS respondent is described by following indicators:

- The prevalence of psychological distress across the population. This categorical indicator is based on the “General Health Questionnaire 12” for general well-being.
- The respondents’ energy level. This indicator is based on the “Vitality scale (VT-4 items) for positive mental health” from the Short-Form Health Survey (SF-36). This index contains four items measuring the respondents’ vital energy level and is used to assess the positive dimension of mental health. This score is recommended by the EUROHIS2 (European project on developing common instruments for health surveys).
- The prevalence of anxiety disorders, the prevalence of depressive disorders, and the prevalence of sleeping disorders. These dichotomized indicators are based on the SCL-90-R subscales (42 items) for depression, anxiety, and sleeping problems.
- The subjective health, the reported depression in the past 12 months and the reported suicidal ideation in the past 12 months based on isolated variables.
- Indicators on risky behaviors are also considered through variables related to addictive substances consumption (“Problematic alcohol consumption” and “Lifetime prevalence of cannabis use”).

Based on the results of the FAMD, all the indicators were kept in order to cover both positive and negative dimensions of mental health and diverse degrees of severity. The use of these standardized variables facilitates comparisons across studies.

To describe respondents’ SES, eight indicators are selected: age, gender, country of birth, household composition, highest educational level within the household, professional activity, employment status, and reported household income. From the lifestyle data, indicators are further selected to describe physical health, social life and physical activity. Regarding respondents’ physical health, three indicators are identified: BMI, reported problems in mobility, and presence of one or more long standing illnesses, chronic conditions, or handicaps. SES and physical health are included as confounders. The indicators ‘appreciation of social life’ and ‘level of health enhancing physical activity’ are included as potential mediators.

Respondents’ perception of environmental problems at their residence is approached through 18 indicators in three different domains.

- Nuisance in the neighborhood is described by: traffic volume; traffic speed; accumulation of rubbish; vandalism; graffiti or deliberate damage of property; and lack of access to parks or other green or recreational public places;
- Nuisance at home is characterized by: air pollution; bad smell from industry; bad smell from others sources (sewer, waste, etc.); vibrations from road, metro, tram, train, or air traffic; noise from road, train, tram, metro, air traffic, factories, and neighbors;

- 1  
2  
3 · Problems linked to the dwelling are approached by: unable to keep the home warm  
4 enough in the winter; problem of humidity or mold in the dwelling; smoke inside the  
5 dwelling every day or almost every day; and overcrowded household.

6 These indicators potentially contain information on environmental degradations not  
7 captured by GIS data and provide a good opportunity to assess the level of  
8 environmental stress felt by the respondents.  
9

### 10 11 *Indicators of urban environment*

12  
13 The urban environment indicators include buildings, network infrastructure, and green  
14 environment. The building structure is described in terms of 2D footprint, spatial  
15 organization, height, etc. The network infrastructure is described by the street network  
16 supporting daily mobility. And the green environment is described in terms of urban  
17 trees, open green public spaces, and private gardens.  
18  
19

20 We make use of two datasets available for the BCR: an open database, called UrbIS  
21 (CIRB-CIBG 2016) providing a set of cartographic data specific to the Region, and  
22 Brussels-Environment (the local environment and energy administration) providing  
23 vegetation data.[37,40] The vegetation data was computed by Van de Voorde et al.  
24 (2010) with high resolution remote sensing data using an NDVI threshold value of  
25 0.275.[37]  
26  
27

28 We process these data using GIS to develop indicators describing the residential  
29 environment of each HIS respondent. We provide indicators at three different scales  
30 to represent the individual's experience at home, on the street, or in the neighborhood:

- 31 · At the scale of the building of the respondent: view of green and garden coverage;  
32 · At the scale of the street in which the respondent lives: canyon effect (height/width  
33 ratio); street corridor effect; linear density of urban trees; and visible street  
34 vegetation coverage;  
35 · At the scale of the neighborhood of the respondent (1 000m): typology of urban  
36 fabric and green coverage.  
37  
38  
39

40 As specified above, a typology of 12 urban fabrics (combination of 21 indicators of  
41 urban environment) has been created to highlight the urban environment as perceived  
42 by pedestrians freely moving on the street network.[41] This typology and other  
43 indicators enable us to approach the concept of walkability by taking into account the  
44 presence of sidewalks, urban street trees, design of the street (canyon and street  
45 corridor effect), visible street vegetation coverage, etc.[42]  
46  
47

### 48 *Air quality data*

49  
50 Data on HIS respondents' exposure to air pollution are obtained from the national  
51 monitoring system supervised by the Belgian interregional environment agency  
52 (IRCEL - CELINE). Regional background levels of particular matter (PM) PM10,  
53 PM2.5, black carbon (BC), ozone (O3) and nitrogen dioxide (NO2) exposure ( $\mu\text{g}/\text{m}^3$ )  
54 are determined for each HIS respondent based on their home address. A land use  
55 regression model is used for background concentrations taking into account land cover  
56 data obtained from satellite images (CORINE Land Cover data set) and daily pollution  
57 data from fixed monitoring stations. Then, this model is superimposed with a dispersion  
58 model to account for point and line sources (industrial smokestacks, road traffic). This  
59  
60



1  
2  
3 results in daily exposure values with a high spatial and temporal resolution.[43-45]  
4 Saenen et al (2017) demonstrated the accuracy of the model to estimate a person's  
5 real exposure by showing that modelled PM2.5 and BC at the residence correlates with  
6 internal exposure to BC particles measured in urine.[45] Using the daily estimates, we  
7 calculate annual averages of PM10, PM2.5, BC, O3 and NO2 exposure levels ( $\mu\text{g}/\text{m}^3$ )  
8 at HIS respondents' home address as indicators for air quality.  
9

### 10 *Noise data*

11  
12  
13 Noise information is derived from the European NOISE database, a system supervised  
14 by the European Commission (directive 2002/49/EC, 2002). It aims at identifying and  
15 mapping noise from road, rail and air traffic and allows an assessment of population  
16 exposure across Europe according to standardized procedures, including harmonized  
17 noise indicators: day–evening–night noise level (Lden) and night noise level (Lnight).  
18 The Lden indicator is an average sound pressure level over all days (12 hours),  
19 evenings (four hours) and nights (eight hours) in a year. Lnight is the A-weighted long-  
20 term average sound level determined over all the night periods (eight hours) of a  
21 year. As associations between mental health and noise pollution are expected to occur  
22 as a result of long-term exposure, it is generally accepted that the most relevant parts  
23 of the whole day or night, which especially account for the time when a person is at  
24 home, are correctly attributed when using average indicators like Lden or Lnight.[46]  
25 Since 2002, measures are done for urban areas counting more than 200 000  
26 inhabitants, every five years, at the most exposed façades of buildings. We will  
27 combine noise maps available for the years 2006 and 2011 with the geographical  
28 coordinates of the participants' residence to estimate Lden and Lnight noise values in  
29 5 dB(A)-intervals. Since the evolution in noise pollution between 2006 and 2011 was  
30 very weak, we can assume that average noise levels in 2008 and 2013 will not  
31 differentiate significantly on a two-years difference from the collected noise data.[47]  
32  
33  
34  
35

### 36 3. Data analysis

37  
38  
39 In a first step, we take full advantage of the HIS dataset itself by investigating the  
40 associations between indicators describing the respondents' mental health and  
41 indicators describing the respondents' perceived environment through bivariate  
42 analyses. Additionally, we describe the distribution of SES across environmental  
43 indicators in order to assess potential "environmental inequalities". These descriptive  
44 analyses permit to identify potential vulnerable groups (likely and among others:  
45 socially deprived, isolated persons, teenagers) that should receive a greater attention.  
46 This first step results in crude distribution patterns to be further investigated with more  
47 complex statistical techniques.  
48  
49

50  
51 In a second step, we merge the database on environmental indicators previously  
52 described with individual data of HIS respondents. Linkage is done at the individual  
53 level and implies to temporarily geo-locate the home address of all respondents ("x,y"  
54 coordinates) at the time they participated in the survey. The relations between all the  
55 environmental variables are assessed through a Principal Component Analysis. Based  
56 on the merged dataset and mental health indicators as previously described, we  
57 analyze relationships between mental health and urban environment characteristics  
58 using multivariate logistic regression models. In order to take into account the complex  
59 relationships between all the environmental variables, single exposure and multi  
60

1  
2  
3 exposure models are performed. Models will be fitted with increasing adjustments for  
4 covariates: respondents' SES, physical health and lifestyle factors. We use structural  
5 equation modelling which provides a flexible framework to assess the potential  
6 mediating role of physical activity, social life, and noise and air pollution in the  
7 associations between mental health and urban environment.[48] We check results for  
8 robustness with sensitivity analyses by for example including only participants living at  
9 the same address for more than one year, and using the environmental factors as  
10 continuous and categorical variables in the analysis.  
11  
12

13 In a third step, we look at the interrelations between the perceived and the objective  
14 exposure (lack of access to parks, air and noise pollution) using general linear models  
15 and classification and regression trees (CART). This allows to assess the share of  
16 subjectivity in respondents' answers.  
17  
18

#### 19 4. Data protection

20  
21 All institutions handling data ensure their protection against leak, theft, misuse or  
22 degradation. In addition to current protection measures already implemented to protect  
23 HIS data, we consider and discuss additional controls such as specific encryption and  
24 special back up with the ICT team and Data Safety Advisor.  
25  
26

### 27 **The qualitative research part**

28  
29 We apply a qualitative descriptive approach and undertake research within a relativist  
30 ontology and subjectivist epistemology. This approach holds the view that reality is  
31 subjective and stresses the active role and contribution the researcher plays in the  
32 research process. The use of a qualitative description approach is most appropriate  
33 for this study as we seek to discover and understand a phenomenon, time and  
34 resources are limited, and this study is part of a mixed method project.[49] In this  
35 project, walking semi-structured interviews are employed as data-collection method.  
36 This method allows to better understand and perceive respondents' daily interactions  
37 in local contexts.[50]  
38  
39

#### 40 1. Study population

41  
42 To capture a diversity of inhabitants in the BCR, we aim for a maximum variation  
43 sample size in the recruitment of the participants. To do so, we apply a purposeful  
44 sampling frame where we aim to reach a diverse sample by selecting diverse study  
45 areas, local organizations, and participants. Five study areas representing a diversity  
46 in urban fabric, population density, access to green and median income are defined.  
47 In each area, we contact a diversity of local organizations involved in either  
48 environmental, socio-cultural, or health-related activities. In each organization, the  
49 project is communicated to the inhabitants through an oral introduction, posters, and  
50 folders. This recruitment strategy intends to reach a varied sample in terms of age,  
51 gender, education level, employment status and cultural background. Only participants  
52 skilled in Dutch, French, or English and a minimum age of 18 years can participate.  
53 Based on sample size recommendations to reach theoretical saturation when using a  
54 semi-structured interview approach, the sample size is estimated to consist of 30  
55 participants.[51] Regarding the complexity of the project theme and the aimed  
56 heterogeneity of respondents, this sample size seems appropriate because of the  
57  
58  
59  
60

1  
2  
3 exploratory nature of this research and the focus on identifying underlying ideas about  
4 the topic.  
5

## 6 2. Data collection 7

8  
9 We invite the participants for semi-structured interviews, which consist in an open  
10 discussion following a guide of topics to be explored.[52] Topics tackled within the  
11 NAMED project include: residential street; neighborhood places, characteristics, and  
12 changes; reasons to walk in neighborhood; future vision on neighborhood. All topics  
13 are questioned in relation to participant's wellbeing. This list serves the interviewer to  
14 keep the flow of the conversation and to remind the participant of the interview purpose.  
15 However, the participants are stimulated to lead the conversation as much as possible  
16 to minimize steering by the interviewer. These discussions take the form of a walking  
17 interview. This approach, also called go-along or walk-along interview, provides  
18 detailed insights into the meanings and practices people associate with their living  
19 environment.[53] Furthermore, it helps to reduce steering the conversation by the  
20 interviewer and the typical power dynamics that exist between the interviewer and  
21 interviewee.[54] At the beginning of the interview the participants are asked to guide  
22 the walk along a route in the neighborhood that allows to discover the places and  
23 characteristics that play an important role in their wellbeing. The interviews are audio-  
24 recorded and GPS-tracked (with consent). The interviews are estimated to take  
25 maximally two hours, including an introduction, the walk and a discussion.  
26  
27  
28

## 29 3. Data analysis 30

31  
32 We apply a thematic analysis on transcripts of the audio-recorded interviews, involving  
33 a three-stage coding process: descriptive coding, interpretative coding, and finally  
34 coming to overarching themes and their relationships.[55,56] We check the themes  
35 appearing in interviews from the same area and across different areas for similarities  
36 and differences in the perception and experiences of the urban residential environment  
37 in relation to subjective wellbeing.  
38

## 39 4. Data protection 40

41  
42 We pseudonymize the transcripts so the identity of the interviewed participants is not  
43 disclosed during the presentation of the research results.  
44

## 45 **The validation part** 46

### 47 1. Data triangulation 48

49  
50 Data triangulation is defined as “a process of validating research conclusions by  
51 examining a relationship from different methodological angles”. [57] Quantitative results  
52 are triangulated with qualitative ones to get a better understanding of the associations  
53 between the urban residential environment and mental health. The qualitative results  
54 can support a better understanding of mechanisms that underlie associations identified  
55 in the quantitative part. If both results provide at some points mutual confirmation, we  
56 can consider the results more valid.[57] In the case that results diverge from each  
57 other, new research questions and hypotheses can emerge.  
58  
59  
60

## 2. Extended peer evaluation

Throughout the project, we consult key stakeholders from local, regional, and national health and environment authorities as well as institutions and experts from the international research community.[58] This allows to evaluate the quality of the project and to produce outcomes relevant not only from a scientific perspective but also from a societal practice perspective. We consult these actors through individual interviews and focus groups. Involvement of experts and stakeholders through participatory processes is a well-established practice for environmental management and policy making.[59-62] Modern views on governance underline that managing the living environment is no longer exclusively seen as the sole responsibility of governmental institutions.[60] It is perceived more as an interplay of different societal actors, including governmental institutions, local communities, and professional and stakeholder groups.[63] When conducting and assessing research findings in the perspective of urban planning, health management, and policy recommendations, the involvement of a diversity of actors seems vital in order to have an encompassing and well-informed view.

### **ETHICS AND DISSEMINATION**

Approval for the data merging in the quantitative research part has been given by the Privacy Commission of Belgium (19/01/2018, reference number 02/2018). The walking interviews with Brussels residents in the qualitative research part has been approved by the ethical committee from the University Hospital of Antwerp (Alternative Ethical Review board of the University of Antwerp) (26/11/2018, reference number 18/44/503). A written informed consent is obtained from the participants.

The team will present and discuss research results in the form of maps, explanatory models, and storytelling and share them with a wide audience including the scientific community, policy authorities, and the civil society through international peer-reviewed publications, scientific conferences, and non-expert communication. We will also make specific efforts to translate and communicate research results to the general public through media, non-profit organizations and specific events (including media, non-profit organizations and specific events). The NAMED website (<https://www.uantwerpen.be/en/projects/named/>) provides an overview of the project, progress, actualities and publications.

### **ACKNOWLEDGEMENTS**

We express our gratitude to all members of the follow up committee who provide relevant input throughout the project. We acknowledge the full HIS team of Sciensano and the Belgian statistical office, Statbel, for their technical support during the process of database merging and linking.

### **COMPETING INTERESTS**

None declared.

### **CONTRIBUTORSHIP STATEMENT**

1  
2  
3 All authors contributed to the conception of the mixed method study protocol. LL, ML,  
4 RR, HB, and HK are responsible for the development and implementation of the  
5 qualitative research part and evaluation part in consultation with IP, ST, MG, NS, EDC,  
6 IT, and TN. IP, ST, MG, NS, EDC, IT, and TN are responsible for the development and  
7 implementation of the quantitative research part in consultation with LL, ML, RR, HB,  
8 and HK. AG and AVN are no longer active on the project but contributed greatly to the  
9 study design and gave their reflections on the manuscript. LL provided a first draft and  
10 adapted the manuscript to the comments from all other authors and reviewers. IP and  
11 ST were responsible for the adjustments to the quantitative research part in the  
12 manuscript. LL and ST proofread the manuscript and made final adjustments. All  
13 authors have read and approved the final version of the manuscript.  
14  
15

## 16 17 **FUNDING**

18  
19 This work was supported by the Belgian Federal Science Policy Office (BELSPO),  
20 grant number BR/175/A3/NAMED.  
21

## 22 23 **DATA STATEMENT**

24  
25 No data are available. Due to privacy legislation, we cannot share the data obtained  
26 and analyzed for the purpose of the NAMED project. More details on data availability  
27 are included in the manuscript.  
28

## 29 30 **PATIENT AND PUBLIC STATEMENT**

31  
32 For the qualitative part, local organizations and experts are involved to reflect on the  
33 interview design. The local organizations support participants recruitment by promoting  
34 the project to their members or visitors. The interviews involve a diverse sample of  
35 inhabitants of the BCR.  
36

37  
38 For the validation part, stakeholders and experts are invited for focus groups to discuss  
39 research results. Their inputs will support final reporting of the project results and  
40 implications.  
41

## 42 43 **REFERENCES**

- 44  
45 1. World Health Organization [Internet]. Mental disorders. WHO; 2018 Apr 9 [cited  
46 2019 Nov 18]. Available from: [https://www.who.int/en/news-room/fact-](https://www.who.int/en/news-room/fact-sheets/detail/mental-disorders)  
47 [sheets/detail/mental-disorders](https://www.who.int/en/news-room/fact-sheets/detail/mental-disorders)  
48 2. Drieskens S, Charafeddine R, Demarest S, et al. HISIA: Belgian Health Interview  
49 Survey - Interactive Analysis. Brussels: Sciensano [cited 2019 Nov 18]. Available  
50 from: <https://hisia.wiv-isp.be/>  
51 3. Regier DA, Farmer ME, Rae DS, et al. One-month prevalence of mental disorders  
52 in the United States and sociodemographic characteristics: the Epidemiologic  
53 Catchment Area study. *Acta Psychiatr Scand* 1993;88:35-47.  
54 4. Alonso J, Angermeyer MC, Bernert S, et al. Prevalence of mental disorders in  
55 Europe: results from the European Study of the Epidemiology of Mental Disorders  
56 (ESEMeD) project. *Acta Psychiatr Scand* 2004;109:21-7.  
57 5. Merikangas KR, He J, Burstein M, et al. Lifetime Prevalence of Mental Disorders in  
58 U.S. Adolescents: Results from the National Comorbidity Survey Replication–  
59  
60

- 1  
2  
3 Adolescent Supplement (NCS-A). *J Am Acad Child Adolesc Psychiatry* 2010;49:980-9.
- 4  
5 6. Bijl RV, Ravelli A, van Zessen G. Prevalence of psychiatric disorder in the general  
6 population: results of the Netherlands Mental Health Survey and Incidence Study  
7 (NEMESIS). *Soc Psychiatry Psychiatr Epidemiol* 1998;33:587-95.
- 8  
9 7. Gruebner O, Rapp MA, Adli M, et al. Cities and Mental Health. *Dtsch Arztebl Int*  
10 2017;114:121-7.
- 11  
12 8. Desjarlais R, Eisenberg L, Good B, Kleinman A . World mental health: Problems  
13 and priorities in low-income countries. USA: Oxford University Press 1995.
- 14  
15 9. Paczkowski MM, Galea S. Sociodemographic characteristics of the neighborhood  
16 and depressive symptoms. *Curr Opin Psychiatry* 2010;23:337-41.
- 17  
18 10. Dalgard OS, Tambs K. Urban environment and mental health: a longitudinal study.  
19 *BJPsych* 1997;171:530-6.
- 20  
21 11. Chu A, Thorne A, Guite H. The impact on mental well-being of the urban and  
22 physical environment: an assessment of the evidence. *J Public Ment Health*  
23 2004;3:17-32.
- 24  
25 12. Clark C, Myron R, Stansfeld S, et al. A systematic review of the evidence on the  
26 effect of the built and physical environment on mental health. *J Public Ment Health*  
27 2007;6:14-27.
- 28  
29 13. Guite HF, Clark C, Ackrill G. The impact of the physical and urban environment on  
30 mental well-being. *Public health* 2006;120:1117-26.
- 31  
32 14. Mair C, Roux AD, Galea S. Are neighbourhood characteristics associated with  
33 depressive symptoms? A review of evidence. *Journal of Epidemiology &*  
34 *Community Health* 2008;62:940-6.
- 35  
36 15. Toma A, Hamer M, Shankar A. Associations between neighborhood perceptions  
37 and mental well-being among older adults. *Health & Place* 2015;34:46-53.
- 38  
39 16. Ma J, Li C, Kwan MP, Chai Y. A Multilevel Analysis of Perceived Noise Pollution,  
40 Geographic Contexts and Mental Health in Beijing. *Int J Environ Res Public Health*  
41 2018;15:1479.
- 42  
43 17. Buoli M, Grassi S, Caldiroli A, et al. Is there a link between air pollution and mental  
44 disorders? *Environment international* 2018;118:154-68.
- 45  
46 18. McCay L, Bremer I, Endale T, et al. Urban design and mental health. *Mental Health*  
47 *and Illness in the City* 2017:1-24.
- 48  
49 19. Lorenc T, Clayton S, Neary D, et al. Crime, fear of crime, environment, and mental  
50 health and wellbeing: mapping review of theories and causal pathways. *Health &*  
51 *Place* 2012;18:757-65.
- 52  
53 20. Gascon M, Triguero-Mas M, Martínez D. Mental health benefits of long-term  
54 exposure to residential green and blue spaces: a systematic review. *Int J Environ*  
55 *Res Public Health* 2015;12:4354-79.
- 56  
57 21. Sugiyama T, Leslie E, Giles-Corti B, et al. Associations of neighbourhood  
58 greenness with physical and mental health: do walking, social coherence and local  
59 social interaction explain the relationships? *Journal of Epidemiology & Community*  
60 *Health* 2008;62:e9.
22. Stigsdotter UK, Ekholm O, Schipperijn J, et al. Health promoting outdoor  
environments - Associations between green space, and health, health-related  
quality of life and stress based on a Danish national representative survey. *Scand*  
*J Public Health* 2010;38:411-7.
23. Nutsford D, Pearson AL, Kingham S. An ecological study investigating the  
association between access to urban green space and mental health. *Public Health*  
2013;127:1005-11.

24. Beyer K, Kalttenbach A, Szabo A, et al. Exposure to neighborhood green space and mental health: evidence from the survey of the health of Wisconsin. *Int J Environ Res Public Health* 2014;11:3453-72.
25. Cox DT, Shanahan DF, Hudson HL, et al. Doses of neighborhood nature: the benefits for mental health of living with nature. *BioScience* 2017;67:147-55.
26. South EC, Hohl BC, Kondo MC, et al. Effect of greening vacant land on mental health of community-dwelling adults: a cluster randomized trial. *JAMA network open* 2018;1:e180298.
27. Cohen-Cline H, Turkheimer E, Duncan GE. Access to green space, physical activity and mental health: a twin study. *J Epidemiol Community Health* 2015;69:523-9.
28. Evans GW. The built environment and mental health. *Journal of urban health* 2003;80:536-55.
29. Rautio N, Filatova S, Lehtiniemi H, et al. Living environment and its relationship to depressive mood: A systematic review. *International Journal of Social Psychiatry* 2018;64:92-103.
30. Moore TH, Kesten JM, López-López JA, et al. The effects of changes to the built environment on the mental health and well-being of adults: Systematic review. *Health & Place* 2018;53:237-57.
31. Benita F, Bansal G, Tunçer B. Public spaces and happiness: Evidence from a large-scale field experiment. *Health & Place* 2019;56:9-18.
32. Melis G, Gelormino E, Marra G, et al. The effects of the urban built environment on mental health: A cohort study in a large northern Italian city. *Int J Environ Res Public Health* 2015 12:14898-915.
33. Gong Y, Palmer S, Gallacher J, et al. A systematic review of the relationship between objective measurements of the urban environment and psychological distress. *Environment international* 2016;96:48-57.
34. Markevych I, Schoierer J, Hartig T, et al. Exploring pathways linking greenspace to health: Theoretical and methodological guidance. *Environmental Research* 2017;158:301-17.
35. Hartig T, Mitchell R, de Vries S, et al. Nature and health. *Annu Rev Public Health* 2014;35:207-28.
36. statbel.fgov.be [Internet]. Brussels: Statbel, the Belgian statistical office; 2018 [cited 2019 Nov 18]. Available from: [statbel.fgov.be/en](http://statbel.fgov.be/en)
37. Van de Voorde T, Canters F, Chan JC. Mapping update and analysis of the evolution of non-built (green) spaces in the Brussels Capital Region. Final Report. Brussels: Cartography and GIS Research Group, Department of Geography, Vrije Universiteit Brussel; Dec 2010. Report No.: ActuaEvol/09
38. Hermia JP, Sierens A. Belges et étrangers en Région bruxelloise, de la naissance à aujourd'hui. IBSA Brussels. 2017 Aug 20.
39. his.wiv-isp.be [Internet]. Brussels: Sciensano; 2019 [cited 2019 Nov 18]. Available from: <https://his.wiv-isp.be/SitePages/Questionnaires.aspx>
40. UrbIS data [Internet]. Brussels: CIRB-CIBG; 2019 [cited 2019 May 6]. Available from: <https://cirb.brussels/fr/nos-solutions/urbis-solutions/urbis-data>
41. Araldi A, Fusco G. From the street to the metropolitan region: Pedestrian perspective in urban fabric analysis. *Environment and Planning B: Urban Analytics and City Science* 2019;46:1243-63.
42. Maghelal PK, Capp CJ. Walkability: A Review of Existing Pedestrian Indices. *Journal of the Urban & Regional Information Systems Association* 2011;23.
43. Janssen S, Dumont G, Fierens F, et al. Spatial interpolation of air pollution measurements using CORINE land cover data. *Atmos Environ* 2008;42:4884-903.

- 1
  - 2
  - 3
  - 4
  - 5
  - 6
  - 7
  - 8
  - 9
  - 10
  - 11
  - 12
  - 13
  - 14
  - 15
  - 16
  - 17
  - 18
  - 19
  - 20
  - 21
  - 22
  - 23
  - 24
  - 25
  - 26
  - 27
  - 28
  - 29
  - 30
  - 31
  - 32
  - 33
  - 34
  - 35
  - 36
  - 37
  - 38
  - 39
  - 40
  - 41
  - 42
  - 43
  - 44
  - 45
  - 46
  - 47
  - 48
  - 49
  - 50
  - 51
  - 52
  - 53
  - 54
  - 55
  - 56
  - 57
  - 58
  - 59
  - 60
44. Lefebvre W, Degrawe B, Beckx C, et al. Presentation and evaluation of an integrated model chain to respond to traffic- and health-related policy questions. *Environ Model Softw* 2013;40:160–70.
45. Saenen ND, Bové H, Steuwe C, et al. Children’s urinary environmental carbon load. A novel marker reflecting residential ambient air pollution exposure? *Am J Respir Crit Care Med* 2017;196:873-81.
46. World Health Organization. Environmental Noise Guidelines for the European Region. Copenhagen: WHO Regional Office for Europe: Copenhagen; 2018.
47. Styns. Evaluatie van de gezondheids- en economische gevolgen van het globale verkeersgeluid in het Brussels Hoofdstedelijk Gewest. BIM, collectie factsheets, thema geluid. Brussels: Leefmilieu Brussel; 2016.
48. Gunzler D, Chen T, Wu P, et al. Introduction to mediation analysis with structural equation modeling. *Shanghai Arch Psychiatry* 2013;25:390–4.
49. Bradshaw C, Atkinson S, Doody O. Employing a qualitative description approach in health care research. *Glob Qual Nurs Res* 2017;4:2333393617742282.
50. Kusenbach M. Street phenomenology: The go-along as ethnographic research tool. *Ethnography* 2003;4:455-485.
51. Morse JM. Determining sample size. *Qual Health Res* 2000;10:3–5.
52. Green J, Thorogood N. Qualitative methods for health research. London: Sage; 2018.
53. O'Brien L, Morris J, Stewart A. Engaging with peri-urban woodlands in England: the contribution to people’s health and well-being and implications for future management. *Int J Environ Res Public Health* 2014;11:6171-92.
54. Carpiano RM. Come take a walk with me: The “Go-Along” interview as a novel method for studying the implications of place for health and well-being. *Health & Place* 2009;15:263-272.
55. Braun V, Clarke V. Using thematic analysis in psychology. *Qual Res Psychol* 2006;3:77-101.
56. Maguire M, Delahunt B. Doing a thematic analysis: A practical, step-by-step guide for learning and teaching scholars. *AISHE-J* 2017;9.
57. Molina-Azorin JF, Bergh DD, Corley KG, et al. Mixed Methods in the Organizational Sciences: Taking Stock and Moving Forward. *Organ Res Methods* 2017;20:179-192.
58. Keune H, Gudrun Koppen, Bert Morrens, et al. Extended Peer Evaluation of an Analytical Deliberative Decision Support Procedure in Environmental Health Practice. *Eur J Risk Regul* 2014;1:25-35
59. Renn O. Participatory processes for designing environmental policies. *Land Use Policy* 2006;23:34–43.
60. Jordan A. The Governance of Sustainable Development: Taking Stock and Looking Forwards. *Environ Plan C Gov Policy* 2008;26:17–33.
61. Reed MS. Stakeholder participation for environmental management: A literature review. *Biol Conserv* 2008;141:2417–31.
62. Brown G, de Bie K, Weber D. Identifying public land stakeholder perspectives for implementing place-based land management. *Landsc Urban Plan* 2015;139:1–15.
63. Hooghe L, Marks G. Unraveling the Central State, but How? Types of Multi-Level Governance. *Am Polit Sci Rev* 2003;97:233–43.



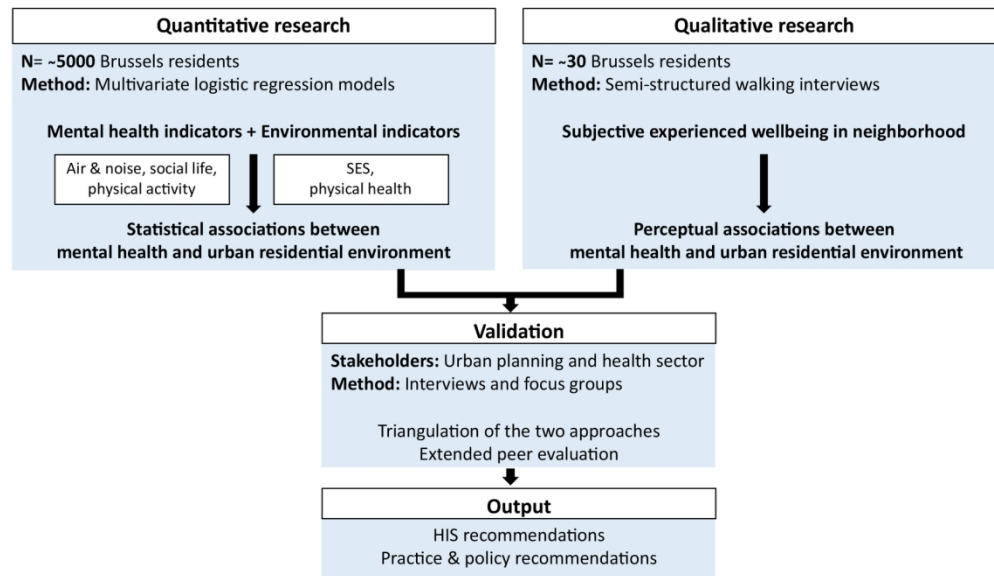

Fig. 1 Schematic overview of the working plan of NAMED with the main characteristics of each research part.

149x90mm (300 x 300 DPI)
